# Supplementary material
Source: PubMed Central journal article supplement (PMC1317398)
Supplement: aem_71_12_7696__1.pdf [file aem_71_12_7696__1.pdf]

Table S1. Fungal strains used in this study.

| <b>Strain name</b> | <b>JCM No.</b> | <b>Termite host</b>              | <b>Location</b> |
|--------------------|----------------|----------------------------------|-----------------|
| KU418              | JCM11089       | <i>Macrotermes gilvus</i>        | Prachinburi     |
| KU419              | JCM11153       | <i>Macrotermes gilvus</i>        | Prachinburi     |
| KU435              | JCM11101       | <i>Macrotermes gilvus</i>        | Prachinburi     |
| KU436              | JCM11102       | <i>Macrotermes gilvus</i>        | Prachinburi     |
| KU437              | JCM11103       | <i>Macrotermes gilvus</i>        | Prachinburi     |
| NS/Mg              | JCM13351       | <i>Macrotermes gilvus</i>        | Pathun Thani    |
| KU403              | JCM11082       | <i>Microtermes</i> sp.           | Prachinburi     |
| KU410              | JCM11086       | <i>Microtermes</i> sp.           | Prachinburi     |
| KU413              | JCM11088       | <i>Microtermes</i> sp.           | Prachinburi     |
| KU430              | JCM11098       | <i>Microtermes</i> sp.           | Prachinburi     |
| KU438              | JCM11104       | <i>Microtermes</i> sp.           | Prachinburi     |
| KU439              | JCM11105       | <i>Microtermes</i> sp.           | Prachinburi     |
| KU440              | JCM11106       | <i>Microtermes</i> sp.           | Prachinburi     |
| KU432              | JCM11100       | <i>Odontotermes</i> sp.          | Prachinburi     |
| KU434              | JCM11157       | <i>Odontotermes</i> sp.          | Prachinburi     |
| KU428              | JCM11096       | <i>Hypotermes</i> sp.            | Saraburi        |
| KU429              | JCM11097       | <i>Hypotermes</i> sp.            | Saraburi        |
| KU444              | JCM11110       | <i>Hypotermes</i> sp.            | Saraburi        |
| KU423              | JCM11091       | <i>Odontotermes longignathus</i> | Saraburi        |
| KU424              | JCM11092       | <i>Odontotermes longignathus</i> | Saraburi        |
| KU425              | JCM11093       | <i>Odontotermes longignathus</i> | Saraburi        |
| KU426              | JCM11094       | <i>Odontotermes longignathus</i> | Saraburi        |
